12 **In the cerebral cortex, sensory information travels along feedforward connections through**  
13 **a hierarchy of areas processing increasingly complex stimulus features<sup>1</sup>. Hierarchical**  
14 **processing, based solely on feedforward connections, has dominated most theories of**  
15 **sensory processing in neuroscience and computer vision over the past 50 years<sup>2,3</sup>. These**  
16 **theories, however, have disregarded the existence of anatomically more prominent**  
17 **feedback connections from higher- to lower-order cortical areas<sup>1</sup>, whose function remains**  
18 **hypothetical. Feedback has been implicated in attention<sup>4,5</sup>, expectation<sup>6</sup>, and sensory**  
19 **context<sup>7,8</sup>, but the cellular mechanisms underlying these diverse feedback functions are**  
20 **unknown. Moreover, it is controversial whether feedback modulates response gain<sup>9-12</sup> or**  
21 **surround suppression<sup>13-15</sup> (the modulatory influence of sensory context on neuronal**  
22 **responses<sup>16-19</sup>) in lower-order areas. Here we have performed the first specific inactivation**  
23 **of cortical feedback at millisecond-time resolution, by optogenetically inactivating feedback**  
24 **connections from the secondary (V2) to the primary visual cortex (V1) in primates.**  
25 **Moderate reduction of V2 feedback activity increased RF size and reduced surround**  
26 **suppression in V1, while strongly reducing feedback activity decreased response gain. Our**  
27 **study has identified a small set of fundamental operations as the cellular-level mechanisms**  
28 **of feedback-mediated top down modulations of early sensory processing. These operations**  
29 **allow the visual system to dynamically regulate spatial resolution, by changing RF size, its**  
30 **sensitivity to image features, by changing response gain, and efficiency of coding natural**  
31 **images, by providing surround suppression.**

32 To determine the cellular mechanisms underlying the influence of cortical feedback on sensory  
33 processing, we asked whether inactivating feedback alters spatial summation and surround  
34 suppression in V1. Spatial summation is the property of V1 neurons to respond maximally to  
35 small stimuli in their RF, but reduce their response to larger stimuli extending into the RF  
36 surround<sup>20-22</sup>. Surround suppression is a basic computation in visual processing<sup>7,16,17,19,23</sup> thought to  
37 increase the neurons' efficiency of coding natural images<sup>24-27</sup>, and to be generated by feedback  
38 connections<sup>7,8,28</sup>. However, the role of feedback in surround suppression has remained  
39 controversial. Inactivation of higher-order cortices has produced weak reduction in surround  
40 suppression in some studies<sup>13-15</sup>, but only reduction in response gain in other studies<sup>9-12</sup>. These  
41 inactivation methods suppress activity in an entire cortical area, thus the observed effects could  
42 have resulted from indirect pathways through the thalamus or other cortical areas. Moreover,  
43 they do not allow fine control of inactivation levels, thus precluding potentially more  
44 physiologically relevant manipulations, and leaving open the possibility that the discrepant  
45 results simply reflected different levels of inactivation. To overcome the technical limitations of  
46 previous studies, we have used selective optogenetic inactivation of V2-to-V1 feedback  
47 terminals, while measuring spatial summation and surround suppression in V1 neurons using  
48 linear electrode arrays (**Fig.1a**).

49 To express the outward proton pump Archaeorhodopsin-T (ArchT)<sup>29</sup> in the axon terminals of V2  
50 feedback neurons, we injected into V2 of marmoset monkeys a mixture of Cre-expressing  
51 (AAV9.CaMKII.Cre) and Cre-dependent adeno-associated virus (AAV9) carrying the genes for  
52 ArchT and green fluorescent protein (AAV9.Flex.CAG.ArchT-GFP; see Methods). Intrinsic  
53 signal optical imaging was performed through thinned skull to identify the V1/V2 border

54 (**Fig.1b**), so as to restrict injections to V2 (**Fig.1c**). This viral vector combination produced  
55 selective anterograde infection of neurons at the injected site and virtually no retrograde  
56 infection of neurons in V1 (**Fig.1c,d**). About 2 months post-injection, linear array recordings  
57 were targeted to GFP/ArchT-expressing V1 regions, identified using GFP-goggles (**Fig.1d**).  
58 Spatial-summation curves of V1 neurons were measured using drifting sinusoidal gratings of  
59 increasing diameter in sufentanil-anesthetized and paralyzed marmosets. Trial interleaved and  
60 balanced surface laser stimulation of increasing intensity was applied to ArchT-expressing axon  
61 terminals of V2 feedback neurons, at the V1 recording site (see Methods). This approach allowed  
62 for selective inactivation of V2 feedback terminals in the superficial (but not deep) layers of V1.

63 We measured spatial summation curves of parafoveal V1 neurons using grating patches of  
64 increasing diameter centered on the neurons' RF. Typical V1 cells increase their response with  
65 stimulus diameter up to a peak (the RF size), and are suppressed for further increases in stimulus  
66 size (surround suppression) (**Fig.2a**). We present spatial summation measurements from 66  
67 visually responsive and stimulus modulated, spike-sorted single units from 3 animals injected  
68 with AAVs. Approximately 61% (40/66) of single units were significantly modulated by the laser  
69 (see Methods). As laser-induced heat can alter cortical spiking activity<sup>30</sup>, we selected a safe range  
70 of laser intensities (9-43 mW/mm<sup>2</sup>), based on results from control experiments in cortex not  
71 expressing ArchT (see **Extended Data Figs.1-2** and Supplementary Information).

72 At low laser intensities (mean±sem 28.7±1.95mW/mm<sup>2</sup>), the majority (76%) of laser-modulated  
73 units showed a shift of the spatial summation peak towards larger stimuli, i.e. an increase in RF  
74 size, which in 46% of cells was accompanied by an increase in the height of the peak, while in  
75 the remainder of cells RF size was unchanged (15%) or decreased (9%) (**Fig.2a-b**). Mean RF  
76 diameter was significantly smaller with intact feedback, compared to when feedback was  
77 inactivated, for cells showing increases in RF size (mean±s.e.m no-laser vs. laser: 1.12±0.08° vs.  
78 1.93±0.08°, p<0.001; **Fig.2b<sub>1</sub>**), cells showing both increases in RF size and peak response  
79 (1.14±0.08° vs. 2.04±0.20°, p<0.001; **Fig. 2b<sub>2</sub>**), and even across the entire neuronal population  
80 (1.27±0.10° vs. 1.83±0.14°, p<0.01), with a mean increase of 56.2±10.7% (p<0.001; **Fig.2b<sub>3</sub>**).  
81 Feedback inactivation increased mean RF diameter in all layers (**Fig.2b<sub>4</sub>**) (no-laser vs. laser:  
82 supragranular layers 1.23±0.11° vs. 1.53±0.10°; granular layer 1.31±0.17° vs. 2.26±0.35°;  
83 infragranular layers 1.29±0.25° vs. 1.88±0.26°; p<0.05). In contrast, surround diameter was not  
84 affected by feedback inactivation across the population (p=0.33) or in individual layers (p>0.27)  
85 (see Supplementary Information).

86 As a result of increased RF size, caused by feedback inactivation, stimuli extending into the  
87 proximal surround (i.e. the surround region closest to the RF; see legend for quantitative  
88 definition), evoked larger neuronal responses (no-laser vs. laser: 36.4±12.3 vs. 43.5±17.2  
89 spikes/s; mean increase 29.2±7.14%, p<0.001; **Fig.2c<sub>1</sub>**), and, therefore, less surround suppression  
90 (or even facilitation) with feedback inactivated when compared with intact feedback. Laser  
91 stimulation reduced the suppression index (SI) for stimuli covering the RF and proximal  
92 surround, measured relative to the peak response in the no-laser condition (SI no-laser vs. laser:  
93 0.21±0.03 vs. 0.006±0.0567, p<0.01; **Fig.2c<sub>2</sub>**) (see Methods). In contrast, the response (no-laser  
94 vs. laser: 20.9±8.71 vs. 19.79 ±7.69 spikes/s; mean spike-rate increase 7.10±13.4%, p=0.92) and  
95 SI (no-laser vs. laser: 0.58±0.05 vs. 0.58±0.05; p=0.945; **Fig.2c<sub>3</sub>**) evoked by stimuli extending  
96 into the more distal surround were unchanged by feedback inactivation. V2 feedback inactivation

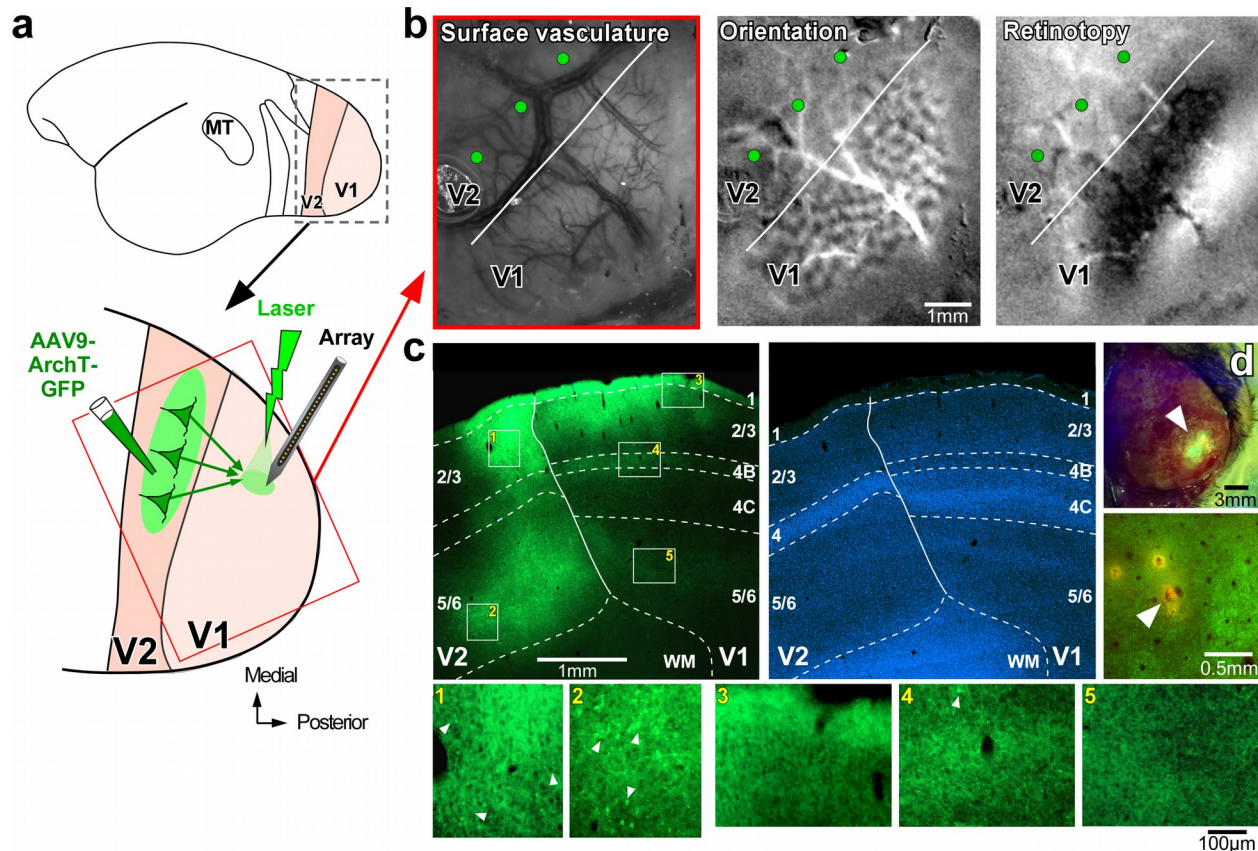

**Figure 1**

97 **Figure 1. Viral injections and ArchT-GFP expression in feedback terminals.** (a) TOP: Schematic of lateral view  
 98 of the marmoset brain. Areas V1 and V2 inside the boxed region are shown enlarged at the bottom. BOTTOM:  
 99 Schematics of the inactivation paradigm: viral injections were targeted to V2, array recordings and photoactivation  
 100 to V1. Red box: approximate location of the imaged region in (b). (b) Orientation-preference and retinotopy maps,  
 101 imaged under red light, were used to identify the V1/V2 border (white line), and to target multiple viral injections  
 102 (green dots) to V2, using as reference the surface vasculature, imaged under green light. (c) TOP LEFT: Sagittal  
 103 section through V1 and V2, viewed under GFP fluorescence, showing two viral injection sites confined to V2, and  
 104 resulting expression of ArchT-GFP in the axon terminals of V2 feedback neurons within V1 layers 1-3, 4B and 5/6  
 105 (typical feedback laminar termination pattern<sup>39,40</sup>). This section was located near the lateralmost aspect of the  
 106 hemisphere, therefore the infragranular layers are elongated due to the lateral folding-over of the cortical sheet.  
 107 Solid contour: V1/V2 border. Dashed contours: laminar borders delineated on the same section counterstained with  
 108 DAPI (TOP RIGHT). BOTTOM (panels 1-5): higher magnification of label inside the white boxes numbered 1-5 in  
 109 the top-left panel. Panels 1-2 show clusters of labeled somata (arrowheads) at the V2 injection sites; instead there is  
 110 only one labeled soma (arrowhead) in panel 4, and none in panels 3,5. (d) TOP: GFP excitation (arrowhead)  
 111 through the intact thinned skull, approximately two months after injection. BOTTOM: Tangential section through  
 112 V1 showing the location of a DiI-coated electrode penetration (arrowhead) amid ArchT-GFP-expressing feedback  
 113 axon terminals (green fluorescence).

114 is, indeed, expected to affect most strongly the suppression arising from the proximal surround,  
 115 and to not abolish distal surround suppression. This is because feedback connections from V2 do  
 116 not extend into the distal surround of V1 neurons, unlike feedback connections from areas V3  
 117 and MT<sup>28</sup>, which were unperturbed in this study.

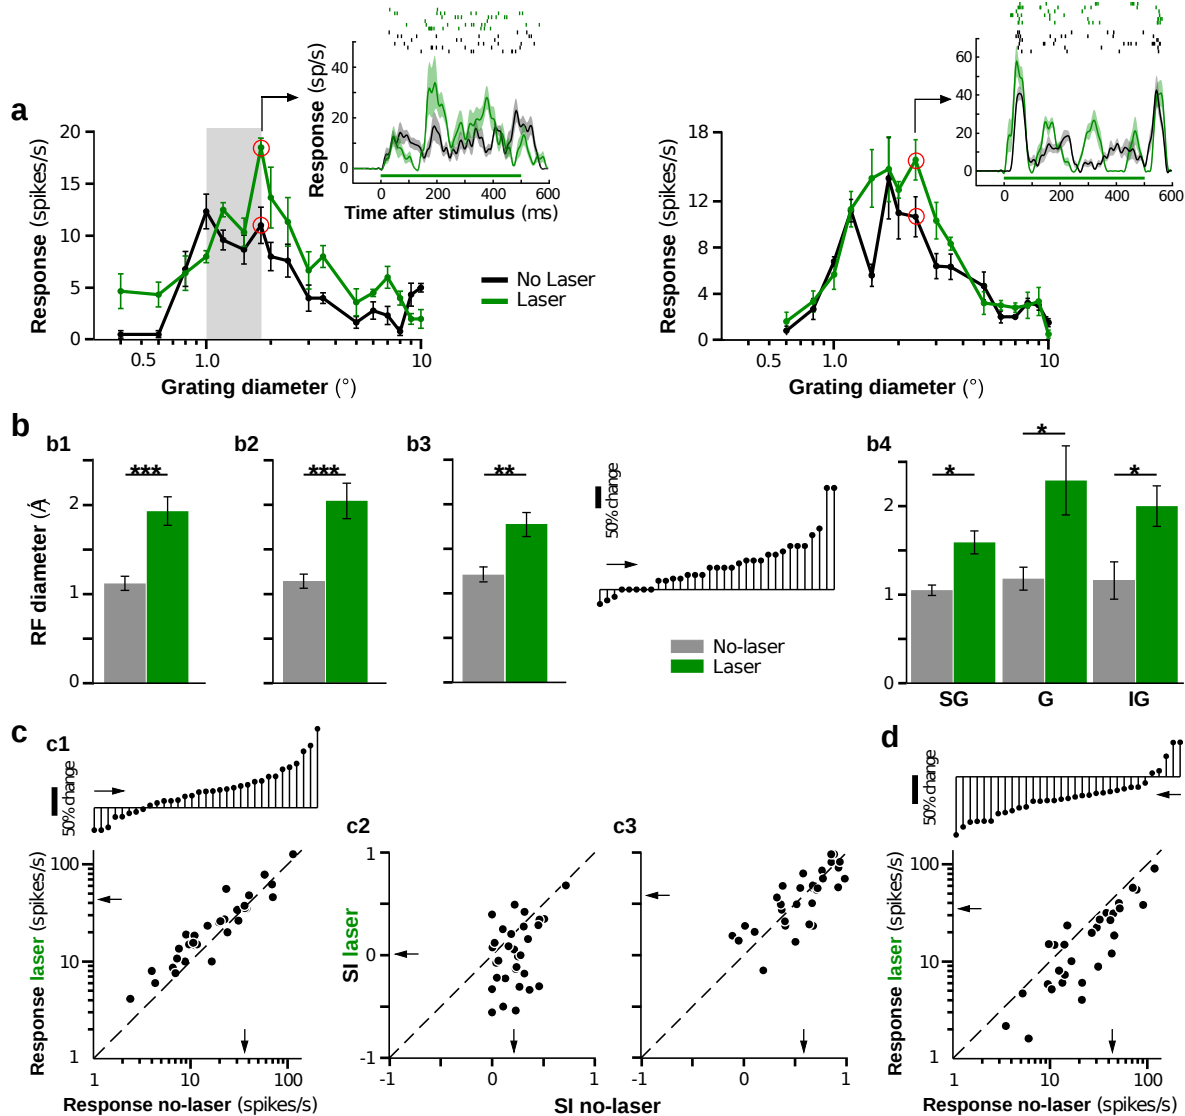

**Figure 2**

118 **Figure 2. Feedback controls RF size and surround suppression.** (a) Spatial summation curves for two example  
 119 V1 cells recorded with (*green*) and without (*black*) laser stimulation. *Gray area in left panel*: proximal surround.  
 120 *Insets*: PSTHs (bottom) and raster plots (top) measured at the stimulus diameters indicated by *red circles* in the  
 121 respective size tuning curves. (b) Mean RF size (diameter at peak response) with and without laser stimulation for:  
 122 (b<sub>1</sub>) cells showing increased RF size with laser stimulation (n=25), (b<sub>2</sub>) cells showing both increased RF size and  
 123 peak response (n=12), and (b<sub>3</sub>) LEFT: all cells (n=33); RIGHT: Cell-by-cell percent change in RF size across the  
 124 entire cell population. *Arrow*: mean. (b<sub>4</sub>) Mean RF size for the same population as in (b<sub>3</sub>), but grouped according to  
 125 layer. (c) Changes in surround-suppression with V2-feedback inactivated. (c<sub>1</sub>) BOTTOM: response with and without  
 126 laser for stimuli involving the RF and proximal surround (the latter defined as the stimulus diameter at the peak of  
 127 the green spatial-summation curve). TOP: Cell-by-cell percent response change caused by laser stimulation, for  
 128 stimuli extending into the proximal surround. Downward and upward stem: decreased and increased response,  
 129 respectively. Scale bar: 50% change in response. (c<sub>2</sub>) SI with and without laser for stimuli extending into the  
 130 proximal surround. A SI of 1 indicates maximal suppression, a SI of 0 indicates no suppression, and negative SI

131 values indicate facilitation (see Methods). (c<sub>3</sub>) Same as (c<sub>2</sub>) but for stimuli extending into the distal surround (largest  
132 stimulus used). (d) BOTTOM: response with and without laser for stimuli confined to the RF (defined as the  
133 stimulus diameter at the peak of the black spatial-summation curve). TOP: Cell-by-cell percent response change  
134 caused by laser stimulation for stimuli confined to the RF.

135 Consistent with previous studies of V2 inactivation<sup>10,12</sup>, we also found that stimuli confined to the  
136 neurons' RF (i.e. the spatial summation peak in the no-laser condition) evoked lower responses  
137 in the laser condition (35.1±15.3 spikes/s) vs. the non-laser condition (43.8±14.1; mean  
138 reduction 32.0±6.03%,  $p < 10^{-5}$ ; **Fig.2d**). There was a moderate, but statistically insignificant,  
139 relationship between response reduction to stimuli in the RF and change in RF diameter when  
140 feedback was inactivated ( $r = -0.31$ ,  $p = 0.11$ , Pearson's correlation), as well as between change in  
141 RF diameter and release from suppression in the proximal surround ( $r = 0.32$ ,  $p = 0.08$ ).

142 Prolonged light pulses directed on ArchT-expressing axon terminals have been shown to  
143 facilitate synaptic transmission, while ArchT photoactivation is consistently suppressive for  
144 pulse widths of  $\leq 200\text{ms}$ <sup>31</sup>. Thus, we performed the analysis described above focusing only on  
145 the first 200ms of the response. The results of the original and shorter time-scale analyses were  
146 qualitatively and quantitatively similar (see Supplementary Information).

147 There is a controversy among previous studies over whether feedback inactivation causes general  
148 reduction of neuronal responses to small and large stimuli or reduced surround suppression in  
149 V1<sup>9-15</sup>. We found that general response reduction occurs for higher levels of feedback  
150 inactivation. About 36% of neurons that showed reduced surround suppression and/or increased  
151 RF size at low laser intensities, showed overall reduced response at higher laser intensities  
152 (mean±sem 36.1±1.52 mW/mm<sup>2</sup>) (**Fig.3a**). Notably, at the laser intensity producing the largest  
153 general suppression, the RF diameter was still significantly smaller with intact feedback  
154 (1.19±0.11°) compared to when feedback was inactivated (1.60±0.14°,  $p < 0.05$ ; **Fig.3b**), but  
155 surround diameter was not significantly affected ( $p = 0.57$ ; see Supplementary Information).  
156 High-intensity laser stimulation significantly reduced responses to stimuli of any size, i.e. those  
157 confined to the RF (no-laser vs. laser: 53.1±9.26 vs. 21.8±3.01 spikes/s; mean reduction:  
158 54.4±3.99%,  $p < 10^{-7}$ ; **Fig.3c**), as well as stimuli extending into the proximal surround (no-laser  
159 vs. laser: 43.1±9.07 vs. 26.5±4.12 spike/s; mean reduction: 28.3±6.14%,  $p < 0.001$ ; **Fig.3d**), or  
160 into the distal surround (no-laser vs. laser: 13.3±3.27 vs. 7.12±1.38 spike/s; mean reduction:  
161 33.2±8.27%,  $p < 0.01$ ; **Fig.3e**). There were no statistically significant differences in spike-width,  
162 maximum spike-rate, baseline, or trial-by-trial variability between cells showing general  
163 suppression at higher laser intensity and cells that did not. However, the former had stronger  
164 surround suppression in the no-laser condition (SI: 0.78±0.03.1% vs. 0.49±0.07%,  $p < 0.05$ ), and  
165 were most prevalent in supragranular layers (albeit this was not statistically significant,  
166  $p_{\text{bootstrap}} = 0.06$ ; **Fig.3f**). As the effective irradiance is higher in supragranular than in other layers, it  
167 is likely that a larger proportion of cells in the infragranular layers would have shown general  
168 suppression, had higher irradiance been delivered to the deeper layers.

169 Our study elucidates the cellular-level basis of how feedback affects information processing in  
170 the primate early visual cortex. Depending on its level of activity, feedback from V2 controls RF  
171 size, surround suppression, and the overall gain of neuronal responses in V1. Changes in RF size  
172 can dynamically alter the visual system's spatial resolution; increasing surround suppression  
173 provides efficient coding of natural images; increasing response gain improves sensitivity to

174 image features.

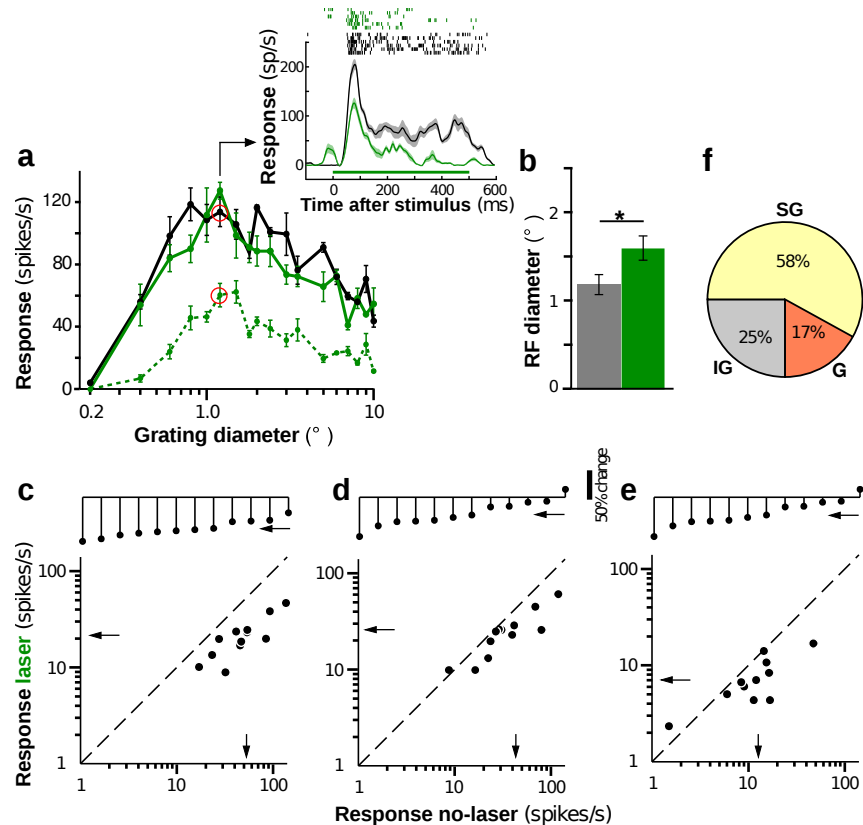

Figure 3

175 **Figure 3. Feedback controls the overall gain of V1 responses.** (a) Spatial-summation curve for one example V1  
 176 cell measured without laser (*black*) and with laser stimulation at two different intensities (*solid green*: 9mW/mm<sup>2</sup>;  
 177 *dashed green*: 43mW/mm<sup>2</sup>). Other conventions as in **Fig. 2a**. (b) Mean RF diameter with and without laser for the  
 178 population of cells showing general suppression (n=12). (c) **BOTTOM**: response with and without laser, and **TOP**:  
 179 Cell-by-cell percent response reduction caused by laser stimulation, for stimuli confined to the RF. (d-e) Same as (c)  
 180 but for stimuli covering the RF and proximal surround (d) or the full extent of the surround (e). (f) Distribution of  
 181 cells showing general suppression across V1 layers.

182 Several forms of top-down influences in sensory processing have been shown to affect neuronal  
 183 responses in the same way as we have shown, here, for feedback from V2. For example, spatial  
 184 attention, one of the most studied instances of top-down modulation, increases the response gain  
 185 of neurons at attended locations<sup>4,32</sup>, modulates surround suppression<sup>33,34</sup>, and, at least in  
 186 parafoveal V1, reduces RF size<sup>35</sup>. Our results suggest that these effects of spatial attention are  
 187 mediated by top-down modulations of feedback to early visual areas.

188 Previous inactivation studies have disagreed over whether feedback regulates surround  
 189 suppression or the overall gain of V1 neuron responses<sup>9-15</sup>. Our study resolves this controversy,  
 190 and suggests that this discrepancy can, in fact, be attributed to different levels of feedback  
 191 inactivation achieved in different studies.

192 Consistent with our findings, a role for feedback in spatial summation and surround suppression  
193 is predicted by recurrent network models of V1, in which the local network becomes more  
194 dominated by inhibition with increasing excitatory input drive<sup>36-38</sup>. In these models, reducing  
195 excitatory feedback inputs to the V1 cells' RF, and thus to the local network, weakens inhibition,  
196 allowing neurons to summate excitatory signals over larger visual field regions (i.e. to increase  
197 their RF size), until inhibition increases again, leading to surround suppression.

198 In summary, our study points to a crucial role of feedback in early visual processing, and  
199 identifies a small set of fundamental operations, changes in RF size, gain and surround  
200 suppression, as the cellular-level mechanisms of feedback-mediated top-down modulations of  
201 sensory responses.

## 202 REFERENCES

- 203 1 Van Essen, D. C. & Maunsell, J. H. R. Hierarchical organization and functional streams  
204 in the visual cortex. *Trends Neurosci.* **6**, 370-375 (1983).
- 205 2 Riesenhuber, M. & Poggio, T. in *The Visual Neurosciences* Vol. 2 (eds L. M. Chalupa &  
206 J. S. Werner) (MIT Press, 2003).
- 207 3 Hubel, D. H. & Wiesel, T. N. Receptive fields, binocular interaction and functional  
208 architecture in the cat's visual cortex. *J. Physiol. (Lond.)* **160**, 106-154. (1962).
- 209 4 McAdams, C. J. & Reid, C. R. Attention modulates the responses of simple cells in  
210 monkey primary visual cortex. *J. Neurosci.* **25**, 11023-11033 (2005).
- 211 5 Luck, S. J., Chelazzi, L., Hillyard, S. A. & Desimone, R. Neural mechanisms of spatial  
212 selective attention in areas V1, V2 and V4 of macaque visual cortex. *J. Neurophysiol.* **77**,  
213 24-42 (1997).
- 214 6 Rao, R. P. & Ballard, D. H. Predictive coding in the visual cortex: a functional  
215 interpretation of some extra-classical receptive-field effects. *Nat. Neurosci.* **2**, 79-87  
216 (1999).
- 217 7 Angelucci, A. *et al.* Circuits and mechanisms for surround modulation in visual cortex.  
218 *Ann. Rev. Neurosci.* **40**, In Press (2017).
- 219 8 Angelucci, A. & Bressloff, P. C. The contribution of feedforward, lateral and feedback  
220 connections to the classical receptive field center and extra-classical receptive field  
221 surround of primate V1 neurons. *Prog. Brain Res.* **154**, 93-121 (2006).
- 222 9 Zhang, S. *et al.* Selective attention. Long-range and local circuits for top-down  
223 modulation of visual cortex processing. *Science* **345**, 660-665 (2014).
- 224 10 Hupé, J. M., James, A. C., Girard, P. & Bullier, J. Response modulations by static texture  
225 surround in area V1 of the macaque monkey do not depend on feedback connections  
226 from V2. *J. Neurophysiol.* **85**, 146-163. (2001).
- 227 11 Wang, C., Huang, J. Y., Bardy, C., FitzGibbon, T. & Dreher, B. Influence of 'feedback'  
228 signals on spatial integration in receptive fields of cat area 17 neurons. *Brain Res.* **1328**,  
229 34-48 (2010).
- 230 12 Sandell, J. H. & Schiller, P. H. Effect of cooling area 18 on striate cortex cells in the  
231 squirrel monkey. *J. Neurophysiol.* **48**, 38-48. (1982).
- 232 13 Hupé, J. M. *et al.* Cortical feedback improves discrimination between figure and  
233 background by V1, V2 and V3 neurons. *Nature* **394**, 784-787. (1998).



- 234 14 Bardy, C., Huang, J. Y., Wang, C., Fitzgibbon, T. & Dreher, B. "Top-down" influences of  
235 ipsilateral or contralateral postero-temporal visual cortices on the extra-classical receptive  
236 fields of neurons in cat's striate cortex. *Neurosci.* **158**, 951-968 (2009).
- 237 15 Nassi, J. J., Lomber, S. G. & Born, R. T. Corticocortical feedback contributes to surround  
238 suppression in V1 of the alert primate. *J. Neurosci.* **33**, 8504-8517 (2013).
- 239 16 Hubel, D. H. & Wiesel, T. N. Receptive fields and functional architecture in two  
240 nonstriate visual areas (18 and 19) of the cat. *J. Neurophysiol.* **28**, 229-289 (1965).
- 241 17 Allman, J., Miezin, F. & Mc Guinness, E. Stimulus specific responses from beyond the  
242 classical receptive field: Neurophysiological mechanisms for local-global comparisons in  
243 visual neurons. *Ann. Rev. Neurosci.* **8**, 407-430 (1985).
- 244 18 Angelucci, A. & Shushruth, S. in *The new visual neurosciences* (eds L. M. Chalupa & J.  
245 S. Werner) Ch. 30, 425-444 (MIT press, 2013).
- 246 19 Van den Bergh, G., Zhang, B., Arckens, L. & Chino, Y. M. Receptive-field properties of  
247 V1 and V2 neurons in mice and macaque monkeys. *J. Comp. Neurol.* **518**, 2051-2070  
248 (2010).
- 249 20 Shushruth, S., Ichida, J. M., Levitt, J. B. & Angelucci, A. Comparison of spatial  
250 summation properties of neurons in macaque V1 and V2. *J. Neurophysiol.* **102**, 2069-  
251 2083 (2009).
- 252 21 Cavanaugh, J. R., Bair, W. & Movshon, J. A. Nature and interaction of signals from the  
253 receptive field center and surround in macaque V1 neurons. *J. Neurophysiol.* **88**, 2530-  
254 2546. (2002).
- 255 22 Sceniak, M. P., Hawken, M. J. & Shapley, R. M. Visual spatial characterization of  
256 macaque V1 neurons. *J. Neurophysiol.* **85**, 1873-1887 (2001).
- 257 23 Nurminen, L., Kilpelainen, M., Laurinen, P. & Vanni, S. Area summation in human visual  
258 system: psychophysics, fMRI, and modeling. *J. Neurophysiol.* **102**, 2900-2909 (2009).
- 259 24 Olshausen, B. A. & Field, D. J. Emergence of simple-cell receptive field properties by  
260 learning a sparse code for natural images. *Nature* **381**, 607-609 (1996).
- 261 25 Schwartz, O. & Simoncelli, E. P. Natural signal statistics and sensory gain control. *Nat.*  
262 *Neurosci.* **4**, 819-825 (2001).
- 263 26 Vinje, W. E. & Gallant, J. L. Natural stimulation of the nonclassical receptive field  
264 increase information transmission efficiency in V1. *J. Neurosci.* **22**, 2904-2915 (2002).
- 265 27 Nurminen, L. & Angelucci, A. Multiple components of surround modulation in primary  
266 visual cortex: multiple neural circuits with multiple functions? *Vision Res.* **104**, 47-56  
267 (2014).
- 268 28 Angelucci, A. *et al.* Circuits for local and global signal integration in primary visual  
269 cortex. *J. Neurosci.* **22**, 8633-8646 (2002).
- 270 29 Han, X. *et al.* A high-light sensitivity optical neural silencer: development and application  
271 to optogenetic control of non-human primate cortex. *Front. Syst. Neurosci.* **5**, 18 (2011).
- 272 30 Stujenske, J. M., Spellman, T. & Gordon, J. A. Modeling the Spatiotemporal Dynamics of  
273 Light and Heat Propagation for In Vivo Optogenetics. *Cell Rep.* **12**, 525-534 (2015).
- 274 31 Mahn, M., Prigge, M., Ron, S., Levy, R. & Yizhar, O. Biophysical constraints of  
275 optogenetic inhibition at presynaptic terminals. *Nat Neurosci* **19**, 554-556 (2016).
- 276 32 McAdams, C. J. & Maunsell, J. H. Effects of attention on orientation-tuning functions of  
277 single neurons in macaque cortical area V4. *J. Neurosci.* **19**, 431-441 (1999).
- 278 33 Ito, M. & Gilbert, C. D. Attention modulates contextual influences in the primary visual  
279 cortex of alert monkeys. *Neuron* **22**, 593-604 (1999).

- 280 34 Sundberg, K. A., Mitchell, J. F. & Reynolds, J. H. Spatial attention modulates center-  
281 surround interactions in macaque visual area v4. *Neuron* **61**, 952-963 (2009).
- 282 35 Roberts, M. J., Delicato, L. S., Herrero, J., Gieselmann, M. A. & Thiele, A. Attention  
283 alters spatial integration in macaque V1 in an eccentricity dependent manner. *Nat.*  
284 *Neurosci.* **10**, 1483-1491 (2007).
- 285 36 Schwabe, L., Obermayer, K., Angelucci, A. & Bressloff, P. C. The role of feedback in  
286 shaping the extra-classical receptive field of cortical neurons: a recurrent network model.  
287 *J. Neurosci.* **26**, 9117-9129 (2006).
- 288 37 Shushruth, S. *et al.* Strong recurrent networks compute the orientation-tuning of surround  
289 modulation in primate primary visual cortex. *J. Neurosci.* **4**, 308-321. (2012).
- 290 38 Rubin, D. B., Van Hooser, S. D. & Miller, K. D. The stabilized supralinear network: a  
291 unifying circuit motif underlying multi-input integration in sensory cortex. *Neuron* **85**,  
292 402-417 (2015).
- 293 39 Rockland, K. S. in *Primary Visual Cortex in Primates* Vol. 10 *Cerebral Cortex* (eds A.  
294 Peters & K. S. Rockland) 261-299 (Plenum Press, 1994).
- 295 40 Federer, F., Merlin, S. & Angelucci, A. Anatomical and functional specificity of V2-to-V1  
296 feedback circuits in the primate visual cortex. *Soc. Neurosci. Abstr. Online.*, 699.602.  
297 (2015).

298 **Acknowledgments.** We thank Kesi Sainsbury for technical assistance. This work was supported  
299 by grants from the National Institute of Health (R01 EY026812, R01 EY019743, BRAIN  
300 U01 NS099702), the National Science Foundation (IOS 1355075, EAGER 1649923), the  
301 University of Utah Research Foundation, The University of Utah Neuroscience Initiative,  
302 to A.A., a grant from Research to Prevent Blindness, Inc. to the Department of  
303 Ophthalmology, University of Utah, and a postdoctoral fellowship from the Ella and  
304 Georg Ehrnrooth Foundation to L.N.

305  
306 **Author contributions** L.N., S.M., M.B. and A.A. designed project and collected  
307 electrophysiological data. L.N, S.M. and F.F. performed optical imaging and viral  
308 injections. L.N. analyzed optogenetic and electrophysiological data. S.M. analyzed  
309 optical imaging data and histological expression of GFP label. S.M. and F.F. generated  
310 histological figures. L.N. and S.M. built the optogenetic stimulation system. A.A.  
311 supervised all aspects of project. L.N., S.M. and A.A. wrote the paper. All authors  
312 discussed the results, commented on and approved the final manuscript.

313 **Author Information** The authors declare no competing financial interests. Correspondence  
314 should be addressed to A.A. (alessandra.angelucci@hsc.utah.edu).

## 315 METHODS

### 316 Surgery and Viral Injections

317 All procedures conformed to the guidelines of the University of Utah Institutional Animal Care  
318 and Use Committee. Each of three marmoset monkeys (*Callithrix jacchus*) received 2-3  
319 injections in dorsal area V2 of a 1:1 viral mixture of AAV9.CaMKII.Cre ( $3.7 \times 10^{13}$  particles/ml)  
320 and AAV9.Flex.CAG.ArchT-GFP ( $9.8 \times 10^{12}$  particles/ml; Penn Vector Core, University of  
321 Pennsylvania, PA). Injections were targeted and confined to V2 using as guidance the location of  
322 the V1/V2 border identified *in vivo* using intrinsic signal optical imaging. Surgical procedures  
323 were as previously described<sup>41</sup>. Briefly, animals were pre-anesthetized with ketamine (25-  
324 30mg/kg, i.m.) and xylazine (1mg/kg, i.m.), intubated, artificially ventilated with N<sub>2</sub>O and O<sub>2</sub>  
325 (70:30), and the head was stereotaxically positioned. Anesthesia was maintained with isoflurane  
326 (1-2%), and end-tidal CO<sub>2</sub>, SPO<sub>2</sub>, electrocardiogram, and body temperature were monitored  
327 continuously. The scalp was opened and the skull was thinned using a dental drill over areas  
328 V1/V2, covered with agar and a coverslip, which was glued to the skull. On completion of  
329 surgery, isoflurane was turned off, anesthesia maintained with sufentanil citrate (8-13µg/kg/hr,  
330 i.v.), and paralysis was induced with repeated 30-60 min intravenous boluses of rocuronium  
331 bromide (0.6mg/kg/hr) to stabilize the eyes. The pupils were dilated with a topical short-acting  
332 mydriatic agent (tropicamide), the corneas protected with gas-permeable contact lenses, the eyes  
333 were refracted, and optical imaging was started. Once the V1/V2 border was functionally  
334 identified, the glass coverslip was removed, small craniotomies and durotomies were performed  
335 over V2, and the viral mixture slowly pressure-injected (240nl/site at 500µm and again at  
336 1200µm depth, using glass pipettes of 40-50µm tip diameter, 15 minutes/240nl). The thinned  
337 skull was reinforced with dental cement, the skin sutured and the animal recovered.

### 338 Optical Imaging

339 Acquisition of intrinsic signals was performed using the Imager 3001 (Optical Imaging Ltd,  
340 Israel) under red light illumination (630 nm). Imaging for orientation and retinotopy allows  
341 identification of the V1/V2 border (**Fig. 1b**). Orientation maps were obtained using full-field,  
342 high-contrast (100%), pseudorandomized achromatic drifting square-wave gratings of 8  
343 orientations at 0.5-2.0 cycles/° spatial frequency and 2.85 cycles/s temporal frequency, moving  
344 back and forth, orthogonal to the grating orientation. Responses to same orientations were  
345 averaged across trials, baseline subtracted, and difference images obtained by subtracting the  
346 response to two orthogonal oriented pairs. V2 could be identified by larger orientation domains  
347 compared to V1 (**Fig. 1b**). Retinotopic maps were obtained by subtracting responses to  
348 monocularly presented oriented gratings occupying complementary adjacent strips of visual  
349 space, i.e. masked by 0.5-1° strips of gray repeating every 1-2°, with the masks reversing in  
350 position in alternate trials. The V1/V2 border was identified by the presence of retinotopic stripes  
351 in V1, as compared to their absence in V2 (**Fig. 1b**). In each case, reference images of the  
352 surface vasculature were taken under 546 nm illumination (green light), and later used as  
353 reference to position pipettes for viral vector injection.

### 354 Electrophysiological Recordings and Visual Stimulation

355 Following 62-68 days transport, after the vector injection, animals were anesthetized and  
356 paralyzed by continuous infusion of sufentanil citrate (6-13µg/kg/h) and vecuronium bromide

357 (0.3mg/kg/h), respectively, and vital signs were continuously monitored, as described above. The  
358 pupils were dilated with topical atropine, protected with lenses and refracted. GFP-expressing V2  
359 injection sites and V1 axonal fields were identified with GFP goggles (**Fig.1d**), and small  
360 craniotomies were made over V1. Extra-cellular recordings were made in V1 with 24-channel  
361 linear multielectrode arrays (V-Probe, Plexon, Dallas, TX; 100 $\mu$ m contact spacing, 20 $\mu$ m contact  
362 diameter) coated in DiI (Molecular Probes, Eugene, OR) to assist with post-mortem  
363 reconstruction of the electrode penetrations, and lowered normal to the cortical surface to a 2-2.2  
364 mm depth over 60-90min. A 128-channel system (Cerebus, Blackrock Microsystems, Salt Lake  
365 City, UT) was used for signal amplification and digitization (30 kHz). Continuous voltage traces  
366 were band-pass filtered (0.5-14.25 kHz), and spikes were detected as spatiotemporal waveforms  
367 using the double-threshold flood fill algorithm<sup>42</sup> (thresholds 2 and 4 x noise S.D.). This  
368 procedure was adopted because the apical dendrites of pyramidal cells run parallel to the probe  
369 shank and may spread the waveforms across multiple channels. A masked EM algorithm<sup>43</sup> was  
370 used for clustering, and manual refinement of the clusters was performed with the Klustasuite<sup>42</sup>.

371 After manually locating the recorded RFs, their aggregate minimum response field was  
372 quantitatively determined using a sparse noise stimulus (500ms, 0.0625–0.25 deg<sup>2</sup> square,  
373 luminance decrement, 5-15 trials) and all subsequent stimuli were centered on this field.  
374 Orientation, eye, spatial and temporal frequency preferences for the cells in the recorded V1  
375 column were determined using 1° diameter, 100% contrast drifting gratings monocularly  
376 presented on an unmodulated gray background of 45cd m<sup>-2</sup> mean luminance. Inactivation  
377 experiments were run using optimal stimulus parameters. To monitor eye movements, the  
378 receptive fields were remapped by hand approximately every 10 minutes, and stimuli were re-  
379 centered in the RF when necessary. Stimuli were presented for 500ms with 750ms inter-stimulus  
380 interval. Stimuli were programmed with Matlab (Mathworks, Natick, MA) and presented on a  
381 linearized CRT monitor (Sony GDM-C520, 600 x 800 pixels, 100Hz, 57cm viewing distance)  
382 and their timing was controlled with the ViSaGe system (Cambridge Research Systems,  
383 Cambridge, UK). Data analysis was performed using custom scripts written in Matlab and  
384 Python<sup>44,45</sup>.

### 385 **Neuronal Sample Selection**

386 We analyzed 66 visually responsive (defined as max response at least 2SD>baseline) and  
387 stimulus modulated (one-way ANOVA, p<0.05) units. Approximately 61% (40/66) of the  
388 visually driven single-units were modulated by one or more laser stimulation intensities (two-  
389 way ANOVA, either laser or stimulus diameter x laser interaction, p<0.05, or at least two  
390 successive data points different in the same direction, p<0.05). We were not able to determine RF  
391 size for eight cells, thus they were excluded from further analysis. For the analysis of the data  
392 presented in **figure 2**, the laser stimulation intensity producing the largest change in RF size (but  
393 within the range of intensities selected on the basis of control experiments- see **Extended Data**  
394 **Figs. 1-2** and Supplementary Information) was determined for each unit separately, and the  
395 analysis was performed at this intensity. For the analysis of the data presented in **figure 3**, a unit  
396 was defined as generally suppressed if the response with laser stimulation was lower than  
397 without the laser for a majority of stimulus sizes. For most units, the response with the laser on  
398 was lower than with the laser off at all stimulus sizes.

### 399 **Identification of Laminar Borders**

400 To ensure that the array was positioned orthogonal to the cortical surface, we used as criteria the  
401 vertical alignment of the mapped RF at each contact, and the similarity in the orientation tuning  
402 curves recorded at each contact (see **Extended Data Fig. 3**). The array was removed from cortex  
403 and repositioned, if significant RF misalignments across contacts were detected. The borders  
404 between the granular layer (4C) and supra- and infragranular layers were determined by applying  
405 current source density (CSD) analysis, using the kernel CSD method<sup>46</sup>, to the band-pass filtered  
406 (1-100 Hz) and trial averaged (n=400) continuous voltage traces evoked by a brief full-field  
407 luminance increment (100ms, every 400ms, 1-89cd m<sup>-2</sup>). As previously established<sup>47</sup>, the first  
408 current sink corresponds to the granular layer, and its borders with the supra- and infra-granular  
409 layers can be determined from the reversals from sink to source above and below the granular  
410 layer, respectively.

### 411 **Laser Stimulation**

412 A 532nm laser (Laserwave, Beijing, China) beam was coupled to a 400µm diameter (NA=0.15)  
413 optical fiber, then expanded and collimated to a 2.8 mm spot. Reported irradiances refer to the  
414 light power exiting the collimator divided by the area of the collimator. Because the beam was  
415 collimated, the illumination spot size depended very little on the distance of the fiber from the  
416 brain. Laser timing was controlled at submillisecond precision, using custom made programs  
417 running on real-time Linux. Light was shone on the surface of V1 through thinned skull in the  
418 regions of GFP expression, and V2 was shielded from light. Laser onset was simultaneous with  
419 stimulus onset and photostimulation continued throughout stimulus presentation (500ms). The  
420 animal's eyes were shielded from the laser light.

### 421 **Statistical Analysis**

422 Statistical p-values refer to either independent sample or one sample two-tailed t-tests. For the  
423 within layer comparisons (**Fig.2b<sub>4</sub>**) where the expected effect direction was known, one-tailed t-  
424 tests are reported. The p-value for the laminar distribution of generally suppressing cells (**Fig.3f**)  
425 ( $p_{\text{bootstrap}}$ , see main text) was computed by randomly sampling layer labels from a uniform  
426 distribution, and computing the proportion of samples in which the proportion exceeded that  
427 observed experimentally.

### 428 **Suppression Index**

429 The Suppression Index (SI) in **Fig. 2c<sub>2-3</sub>** was computed as follows:  $SI_{\text{no-laser}} = (R_{C\text{-no-laser}} - R_{CS\text{-no-laser}}) /$   
430  $R_{C\text{-no-laser}}$ .  $SI_{\text{laser}} = (R_{C\text{-no-laser}} - R_{CS\text{-laser}}) / R_{C\text{-no-laser}}$ , where  $R_{C\text{-no-laser}}$  is the response to a stimulus confined  
431 to the RF (the peak of the summation curve) in the no-laser condition,  $R_{CS\text{-no-laser}}$  is the response to  
432 the stimulus covering the RF and surround in the no-laser condition (the proximal surround only  
433 for the measurements in **Fig. 2c<sub>2</sub>**, and the full extent of the surround for the measurements in **Fig.**  
434 **2c<sub>3</sub>**), and  $R_{CS\text{-laser}}$  is the response to the stimulus covering the RF and surround in the laser  
435 condition.

### 436 **Histology**

437 On completion of the recording session, the animal was perfused transcardially with 2-4%  
438 paraformaldehyde in 0.1M phosphate buffer. The occipital pole was frozen-sectioned at 40µm,  
439 tangentially to the cortical surface (n=2 brains), or sagittally (n=1). GFP label in V2 and V1 and  
440 DiI tracks were visualized under fluorescence to ascertain injection sites were confined to V2,  
441 and electrode penetrations were targeted to regions expressing GFP (**Fig.1c-d**). Electrode

442 penetrations from regions with low GFP expression were eliminated from analysis. Sections  
443 were counterstained with DAPI (Sigma-Aldrich, St. Louis, MO) to identify V1/V2 border and  
444 cortical layers (**Fig.1c**).

445 **REFERENCES (numbering to continue from references in the main text)**

- 446 41 Federer, F. *et al.* Four projections streams from primate V1 to the cytochrome oxidase  
447 stripes of V2. *J. Neurosci.* **29**, 15455-15471 (2009).
- 448 42 Rossant, C. *et al.* Spike sorting for large, dense electrode arrays. *Nat. Neurosci.* **19**, 634-  
449 641 (2016).
- 450 43 Kadir, S. N., Goodman, D. F. & Harris, K. D. High-dimensional cluster analysis with the  
451 masked EM algorithm. *Neural. Comput.* **26**, 2379-2394 (2014).
- 452 44 Hunter, J. D. Matplotlib: A 2D graphics environment. *Comput. Sci. Eng.* **9**, 90-95 (2007).
- 453 45 van der Walt, S., Colbert, S. C. & Varoquaux, G. The NumPy Array: A Structure for  
454 Efficient Numerical Computation. *Comput. Sci. Eng.* **13**, 22-30 (2011).
- 455 46 Potworowski, J., Jakuczun, W., Leski, S. & Wojcik, D. Kernel current source density  
456 method. *Neural. Comput.* **24**, 541-575 (2012).
- 457 47 Schroeder, C. E., Mehta, A. D. & Givre, S. J. A spatiotemporal profile of visual system  
458 activation revealed by current source density analysis in the awake macaque. *Cerebral*  
459 *Cortex* **8**, 575-592 (1998).
- 460

## 461 SUPPLEMENTARY INFORMATION

### 462 Analysis of Surround Field Size

463 For the population of cells showing an increase in RF diameter when feedback was inactivated,  
464 we found no changes in the size of the surround field. Average surround diameter in the no-laser  
465 vs. laser condition was  $4.71 \pm 0.43^\circ$  vs.  $5.38 \pm 2.77^\circ$  ( $p=0.33$ ). At high laser intensity, many cells  
466 showed general response suppression for small and large stimuli. These cells also showed an  
467 increase in RF size (see main text), but no significant increase in the size of the suppressive  
468 surround fields (mean surround diameter in the no-laser vs. laser condition:  $4.48 \pm 0.43^\circ$  vs.  
469  $4.07 \pm 0.53^\circ$ ,  $p=0.57$ ).

### 470 Control Experiments in Cortex Not Expressing ArchT

471 For the main experiment, laser intensities were selected based on a control experiment in one  
472 animal ( $n=2$  penetrations) on cortex not expressing ArchT. Recordings and analysis were  
473 otherwise identical to the main experiment.

474 We found light artifacts at relatively low light intensities ( $63\text{mW}/\text{mm}^2$ ; see **Extended Data**  
475 **Fig.1a**), which, to our surprise, have been commonly used in previous optogenetic experiments.  
476 The laser artifacts were qualitatively different in superficial and deep layers: spike-rates were  
477 usually increased in superficial layers, but decreased in deep layers (**Extended Data Fig.1a**). For  
478 granular and infragranular layers, irradiances at or below  $43\text{mW}/\text{mm}^2$  did not produce  
479 statistically significant changes in the cells' size tuning curves (e.g. **Extended Data Fig.1a**). For  
480 some contacts (8/16) in supragranular layers, instead, the laser-on and control curves differed  
481 significantly at  $43\text{mW}/\text{mm}^2$  irradiance. Importantly, however, the effect of light on these cells  
482 was always a *decrease* in RF diameter, i.e. an effect opposite to that caused by the laser in ArchT  
483 expressing cortex (**Extended Data Fig.1a**). Because these light artifacts could not account for  
484 the observed effects of feedback inactivation, we included in our main analysis laser intensities  
485 up to  $43\text{mW}/\text{mm}^2$ .

486 However, to further corroborate that our results of feedback inactivation could not be attributed  
487 to laser-induced artifacts, we repeated all the main analyses of data recorded in ArchT-expressing  
488 cortex, after excluding supragranular units which showed inactivation effects at laser irradiances  
489  $>19\text{mW}/\text{mm}^2$ , i.e. irradiance levels that may produce artifacts in supragranular layer cells. The  
490 results of this analysis were qualitatively and quantitatively similar to the original analysis.  
491 Importantly, we performed a similar analysis for the population of units recorded in cortex not  
492 expressing ArchT, including supragranular cells at laser irradiance of  $19\text{mW}/\text{mm}^2$ , and granular  
493 and infragranular cells at laser irradiance of  $43\text{mW}/\text{mm}^2$ ; we found not statistically significant  
494 changes in RF diameter or response amplitude in the proximal surround in the control data at  
495 these laser intensities. The results of these analysis are described below.

### 496 Analysis of Control Data in Cortex Not Expressing ArchT (Extended Data Fig.1).

497 We included in this analysis supragranular cells at laser irradiance of  $19\text{mW}/\text{mm}^2$ , and  
498 infragranular cells at laser irradiance of  $43\text{mW}/\text{mm}^2$  ( $n=10$  reliable contacts). Laser illumination  
499 induced no significant changes in RF diameter (mean $\pm$ s.e.m no-laser vs. laser:  $1.8 \pm 0.06^\circ$  vs.

500  $1.7 \pm 0.12^\circ$ ,  $p=0.66$ ; mean decrease  $6.61 \pm 4.72\%$ ; **Extended Data Fig.1b**) or response amplitude in  
 501 the proximal surround (no-laser vs. laser:  $113.6 \pm 15.43$  vs.  $111.5 \pm 15.81$ ,  $p=0.74$ ; mean decrease  
 502  $8.3 \pm 3.10\%$ ; **Extended Data Fig.1c**). This demonstrates that the effects on V1 cells' RF size and  
 503 surround suppression that we observed after inactivating V2 feedback did not reflect artifacts  
 504 produced by light.

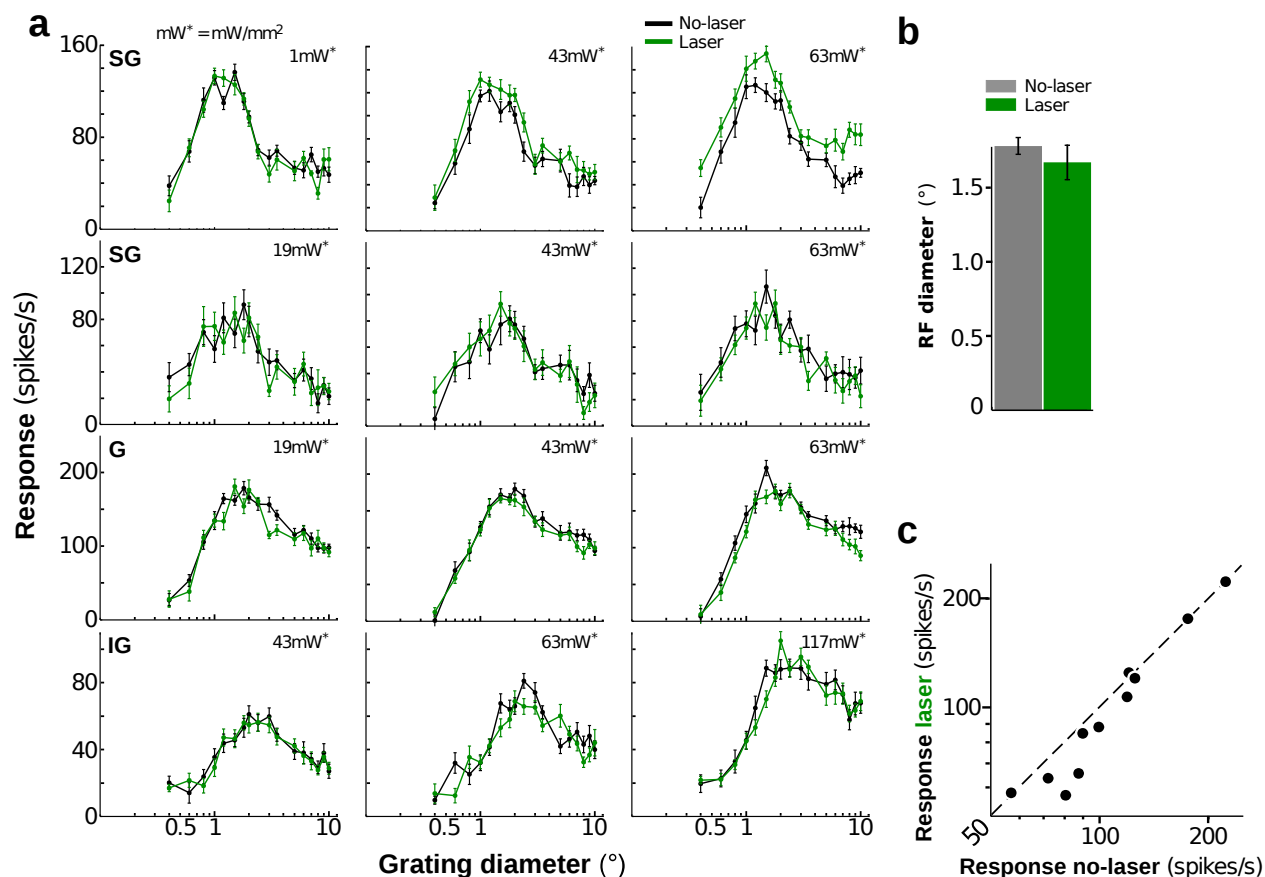

### Extended Data Figure 1

505 **Extended Data Figure 1. Light intensity selection for the main experiments.** (a) Spatial summation curves in  
 506 control cortex not expressing ArchT for four example units in different layers recorded at different light intensities.  
 507 (b) RF sizes measured without (grey) and with (green) laser stimulation. The RF sizes were not significantly  
 508 different. (c) Responses ( $n=11$ ) at the proximal surround were not significantly different without and with laser  
 509 stimulation.

510 Analysis of Data in Cortex Expressing ArchT, excluding supragranular cells showing  
 511 inactivation effects at  $>19\text{mW}/\text{mm}^2$  irradiance (**Extended Data Fig.2**).

512 Mean RF diameter was significantly smaller with intact feedback, compared to when feedback  
 513 was inactivated (mean  $\pm$  s.e.m no-laser vs. laser:  $1.24 \pm 0.11^\circ$  vs.  $1.83 \pm 0.17^\circ$ ,  $p=0.007$ ; **Extended**  
 514 **Data Fig.2a**), with a mean increase of  $59.3 \pm 13.0\%$  ( $p < 0.001$ ). As for the original analysis (**Fig.**  
 515 **2c**), stimuli extending into the proximal surround evoked larger neuronal responses (no-laser vs.  
 516 laser:  $42.0 \pm 15.4$  vs.  $51.8 \pm 21.5$  spikes/s; mean increase  $30.0 \pm 6.34\%$ ,  $p < 0.01$ ; **Extended Data**  
 517 **Fig.2b<sub>1</sub>**), and, therefore, less surround suppression when feedback was inactivated compared to  
 518 when feedback was intact. Laser stimulation reduced the suppression index (SI) for stimuli



515 covering the RF and proximal surround (SI no-laser vs. laser:  $0.18 \pm 0.03$  vs.  $-0.02 \pm 0.06$ ,  $p < 0.01$ ;  
 516 **Extended Data Fig.2b<sub>2</sub>**). In contrast, the response (no-laser vs. laser:  $13.1 \pm 2.63$  vs.  $13.3 \pm 2.73$   
 517 spikes/s; mean spike-rate increase  $10.6 \pm 11.2\%$ ,  $p = 0.37$ ) and SI (no-laser vs. laser:  $0.57 \pm 0.05$  vs.  
 518  $0.55 \pm 0.06$ ; **Extended Data Fig.2b<sub>3</sub>**) evoked by stimuli extending into the more distal surround  
 519 were unchanged by feedback inactivation. Stimuli confined to the neurons' RF evoked lower  
 520 responses in the laser condition ( $41.1 \pm 19.2$  spikes/s) vs. the non-laser condition ( $50.1 \pm 17.6$   
 521 spikes/s; mean reduction  $30.3 \pm 6.34\%$ ,  $p < 0.001$ ; **Extended Data Fig.2c**). We conclude that  
 522 increased RF diameter and reduced surround suppression indeed resulted from inactivating V2  
 523 feedback to V1, and were not caused by laser-induced heat artifacts.

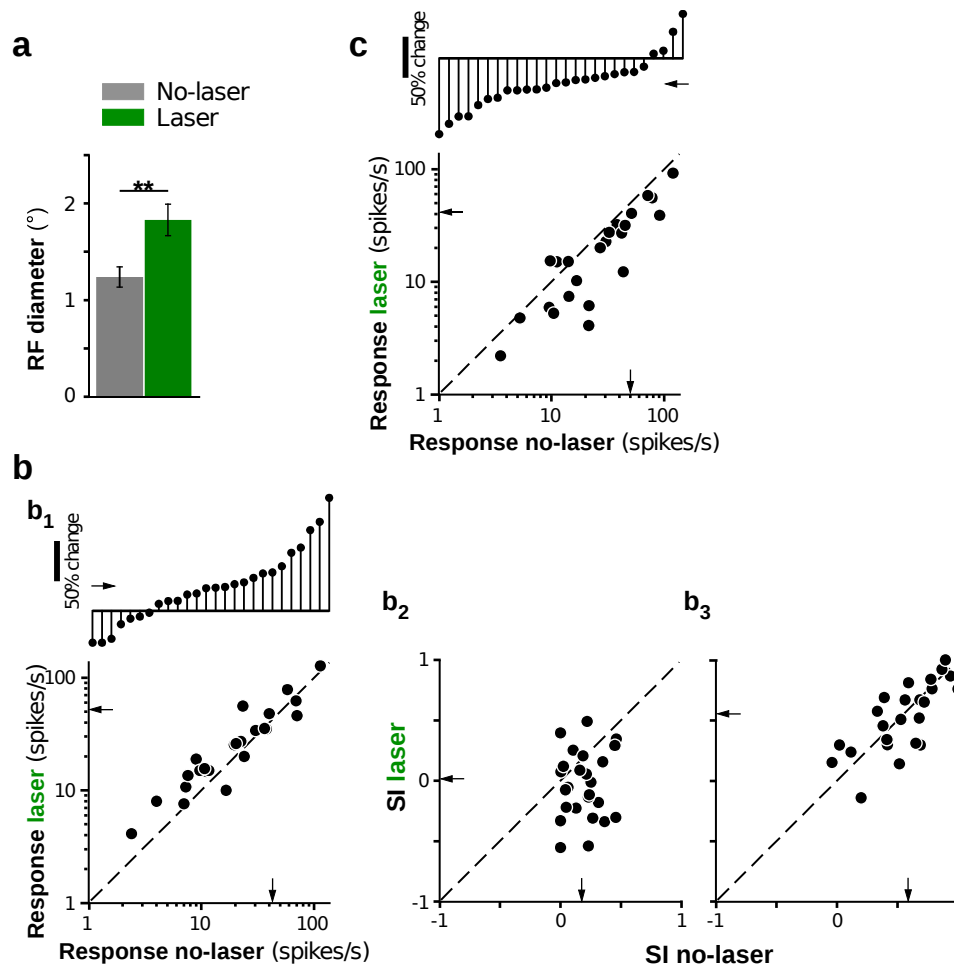

## Extended Data Figure 2

524 **Extended Data Figure 2. Analysis in cortex expressing ArchT, excluding supragranular cells showing light-**  
 525 **induced artifacts at laser irradiance >19 mW/mm<sup>2</sup>.** (a) Mean RF diameter with and without laser stimulation. (b)  
 526 Changes in surround suppression with V2 feedback inactivated. (b<sub>1</sub>) BOTTOM: response with and without laser for  
 527 stimuli involving the RF and proximal surround. TOP: Cell-by-cell percent response change caused by laser  
 528 stimulation, for stimuli extending into the proximal surround. (b<sub>2</sub>) SI with and without laser for stimuli extending  
 529 into the proximal surround. (b<sub>3</sub>) Same as (b<sub>2</sub>) but for stimuli extending into the distal surround. (c) BOTTOM:  
 530 response with and without laser for stimuli confined to the RF. TOP: Cell-by-cell percent response change by  
 531 laser stimulation, for stimuli confined to the RF.

532 None of the units recorded in the control experiment showed reduced response at the irradiances  
533 used for the analysis of data in **Fig.3**. Thus, we are confident that the general response  
534 suppression for small and large stimuli observed in the data reported in **Fig.3**, resulted from  
535 inactivating feedback axons.

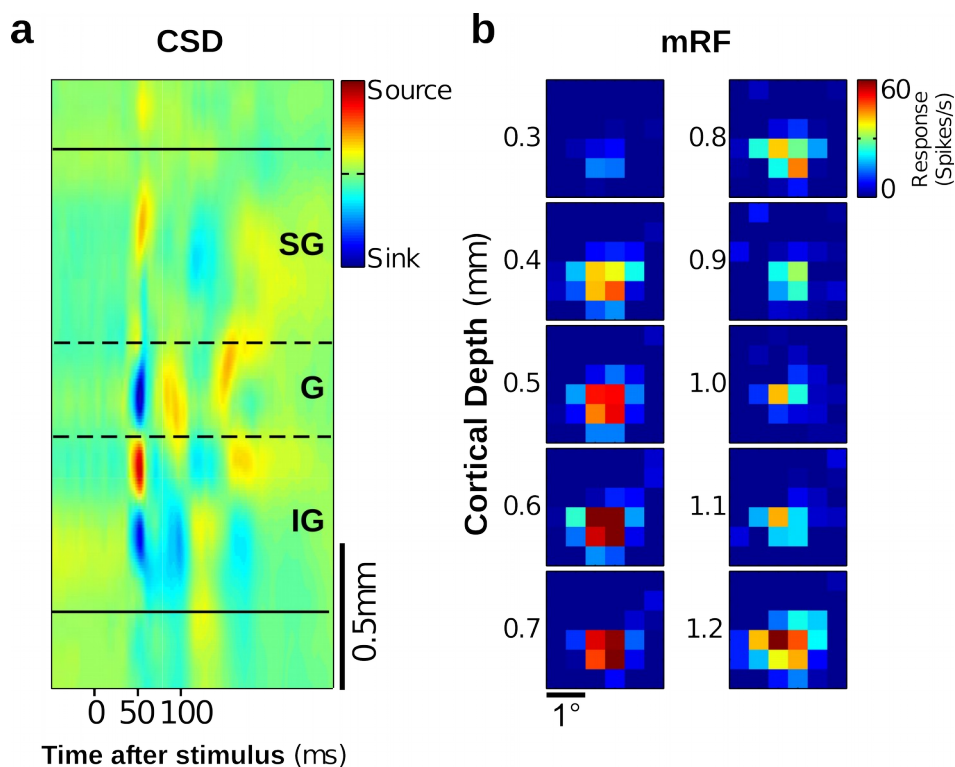

### Extended Data Figure 3

536 **Extended Data Figure 3. Recordings of CSD and minimum RF (mRF) ensure linear array spans all cortical**  
537 **layers, and is positioned normal to cortical surface.** (a) Current source density (CSD) analysis of local field  
538 potential (LFP), used to determine cortical layers and ensure contacts span the full extent of the cortical sheet. (b)  
539 mRF mapping (see Methods) across contacts through the depth of V1. Hot spots (regions of max spiking rate) are  
540 aligned across contacts, confirming the array is positioned normal to the V1 surface. SG: Supragranular layers, G:  
541 Granular layer, IG: Infragranular layers.

### 542 Control Analysis for Laser Stimulation Time

543 Inactivation of axon terminals using ArchT can, counter intuitively, facilitate synaptic  
544 transmission for prolonged light pulses, while ArchT is consistently suppressive for pulse widths  
545 of  $\leq 200$ ms. Thus, we repeated our analysis by focusing only on the first 200ms of the response.  
546 We found no qualitative differences between the original analysis and the short time-scale  
547 analysis. Consistent with the original analysis, RF diameter was increased when feedback was  
548 inactivated (no-laser vs. laser:  $1.14 \pm 0.07^\circ$  vs.  $1.67 \pm 0.24$ ,  $p < 0.05$ ,  $n = 19$  units producing reliable  
549 responses within the initial 200ms), responses to stimuli confined to the RF were significantly  
550 reduced (no-laser vs. laser:  $26.1 \pm 8.89$  vs.  $21.6 \pm 10.3$  spikes/s; mean spike-rate reduction  
551  $45.1 \pm 8.62\%$ ,  $p < 0.001$ ), and responses to stimuli covering the RF and proximal surround were

551 increased (mean spike-rate increase  $67.6 \pm 34.0$  %,  $p < 0.06$ ). We conclude that the observed laser-  
552 induced effects reflect suppressed, rather than facilitated, V2 feedback activity.
